# Supplementary material for: Quinoa bran polyphenol extract attenuates high-fat diet induced non-alcoholic fatty liver disease in mice
Source: Royal Society of Chemistry journal article supplement (doi:10.1039/d4fo02647k), 2025-01-01
Supplement: d4fo02647k1.pdf [file d4fo02647k1.pdf]

SUPPORTING INFORMATION:

**Quinoa bran polyphenol extract attenuates high-fat diet induced  
non-alcoholic fatty liver disease in mice**

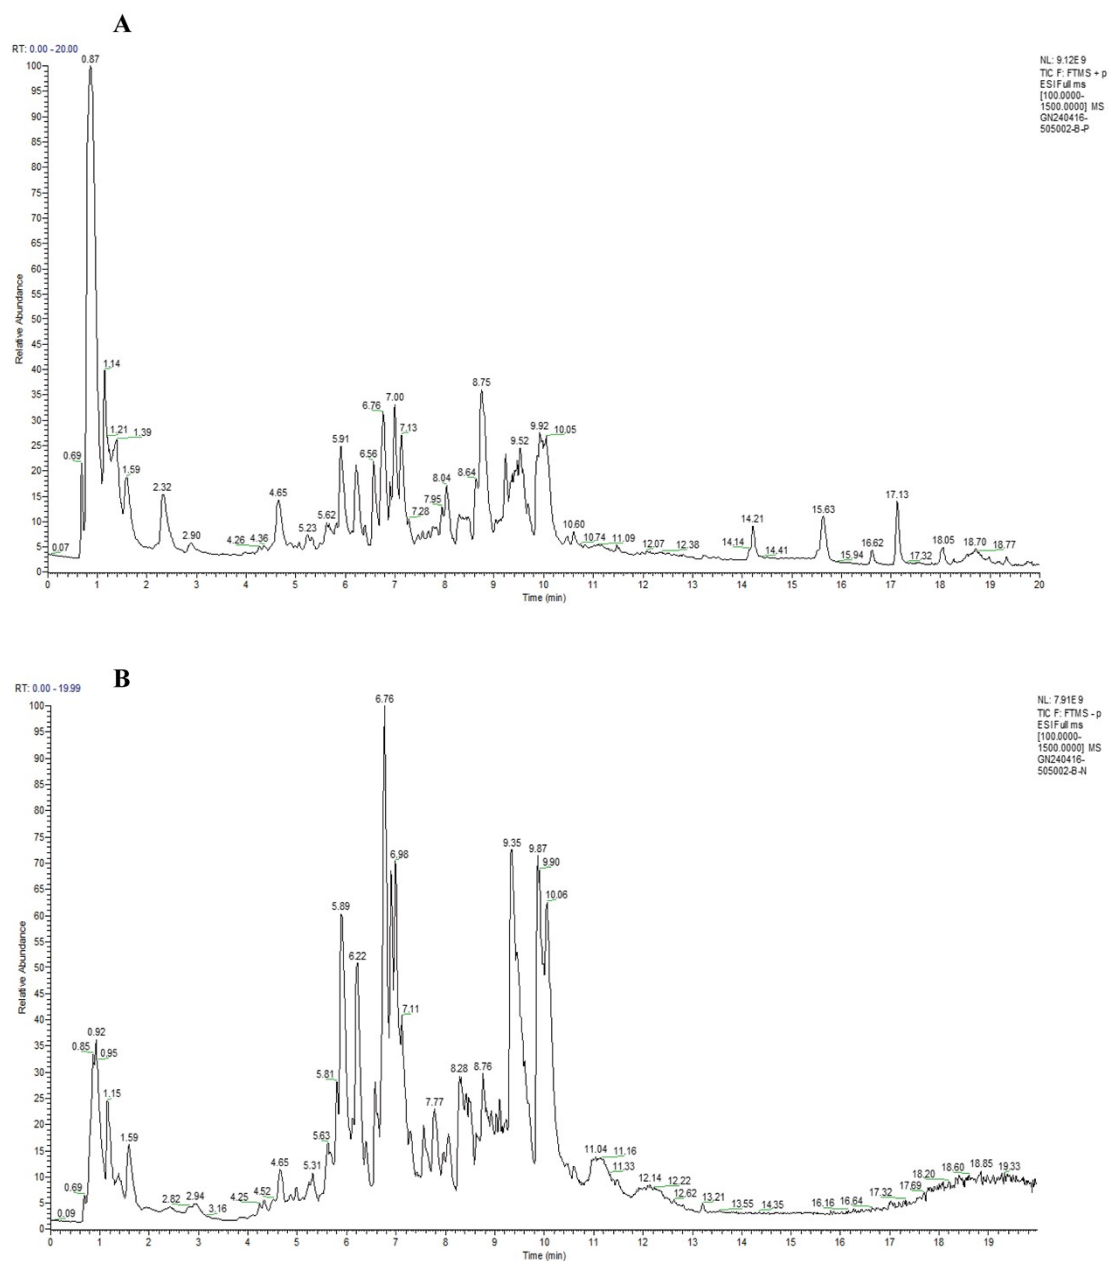

**Fig. S1** QBP total ion current (TIC) diagram. (A) positive ion, (B) negative ion.

**Table S1** D12492 Ingredient list.

| <b>Product #</b>                      | <b>D12492</b> |              |
|---------------------------------------|---------------|--------------|
|                                       | <b>gm%</b>    | <b>kcal%</b> |
| Protein                               | 26.2          | 20           |
| Carbohydrate                          | 26.3          | 20           |
| Fat                                   | 34.9          | 60           |
| <b>Ingredient</b>                     | <b>gm</b>     | <b>kcal</b>  |
| Casein, 80 Mesh                       | 200           | 800          |
| L-Cystine                             | 3             | 12           |
| Corn Starch                           | 0             | 0            |
| Maltodextrin 10                       | 125           | 500          |
| Sucrose                               | 68.8          | 275.2        |
| Cellulose, BW200                      | 50            | 0            |
| Soybean Oil                           | 25            | 225          |
| Lard*                                 | 245           | 2205         |
| Mineral Mix, S10026                   | 10            | 0            |
| DiCalcium Phosphate                   | 13            | 0            |
| Calcium Carbonate                     | 5.5           | 0            |
| Potassium Citrate, 1 H <sub>2</sub> O | 16.5          | 0            |
| Vitamin Mix, V10001                   | 10            | 40           |
| Choline Bitartrate                    | 2             | 0            |
| FD&C Blue Dye #1                      | 0.05          | 0            |
| <b>Total</b>                          | <b>773.85</b> | <b>4057</b>  |

**Table S2** Food intake of different groups of mice.

| Weeks                     | C         | C-H       | HF        | QBP-L     | QBP-H     |
|---------------------------|-----------|-----------|-----------|-----------|-----------|
| Food intake (g/mouse/day) |           |           |           |           |           |
| 1                         | 2.82±0.20 | 2.71±0.05 | 3.00±0.09 | 3.07±0.14 | 2.69±0.17 |
| 2                         | 3.14±0.21 | 2.70±0.11 | 2.87±0.10 | 2.88±0.09 | 2.68±0.33 |
| 3                         | 2.96±0.02 | 2.63±0.15 | 3.11±0.40 | 2.98±0.43 | 2.66±0.22 |
| 4                         | 3.15±0.06 | 2.77±0.04 | 3.02±0.34 | 2.95±0.46 | 2.76±0.18 |
| 5                         | 3.13±0.01 | 3.04±0.05 | 2.99±0.07 | 2.96±0.44 | 2.81±0.07 |
| 6                         | 3.04±0.12 | 2.76±0.00 | 3.05±0.15 | 3.00±0.42 | 2.65±0.01 |
| 7                         | 3.12±0.02 | 2.90±0.11 | 3.19±0.00 | 3.07±0.48 | 2.86±0.09 |
| 8                         | 2.80±0.39 | 2.80±0.10 | 2.89±0.16 | 2.92±0.08 | 2.87±0.15 |
| 9                         | 2.88±0.20 | 2.68±0.05 | 2.90±0.09 | 3.01±0.18 | 2.64±0.06 |
| 10                        | 3.00±0.37 | 2.65±0.03 | 3.05±0.15 | 2.98±0.23 | 2.88±0.11 |
